# Supplementary material for: Temporal Microbial Dynamics in Feces Discriminate by Nutrition, Fecal Color, Consistency and Sample Type in Suckling and Newly Weaned Piglets
Source: MDPI journal article supplement (doi:10.3390/ani13142251), 2023-07-09
Supplement: s1 [file s1]

## Article

# Temporal Microbial Dynamics in Feces Discriminate by Nutrition, Fecal Color, Consistency and Sample Type in Suckling and Newly Weaned Piglets

Barbara U. Metzler-Zebeli <sup>1,2,\*</sup>, Frederike Lerch <sup>1,2</sup>, Fitra Yosi <sup>1,2,3</sup>, Julia Vötterl <sup>1,2</sup>, Juliane Ehmig <sup>1,2</sup>, Simone Koger <sup>2,4</sup> and Doris Verhovsek <sup>5</sup>

<sup>1</sup> Unit Nutritional Physiology, Department of Biomedical Sciences, University of Veterinary Medicine Vienna, 1210 Vienna, Austria

<sup>2</sup> Christian-Doppler Laboratory for Innovative Gut Health Concepts of Livestock, University of Veterinary Medicine Vienna, 1210 Vienna, Austria

<sup>3</sup> Department of Animal Science, Faculty of Agriculture, University of Sriwijaya, Palembang 30662, Indonesia

<sup>4</sup> Institute of Animal Nutrition and Functional Plant Compounds, Department for Farm Animals and Veterinary Public Health, University of Veterinary Medicine Vienna, 1210 Vienna, Austria

<sup>5</sup> University Clinic for Swine, Department for Farm Animals and Veterinary Public Health, University of Veterinary Medicine Vienna, 1210 Vienna, Austria

\* Correspondence: barbara.metzler@vetmeduni.ac.at

## Supplementary Materials

**Citation:** Metzler-Zebeli, B.U.; Lerch, F.; Yosi, F.; Vötterl, J.; Ehmig, J.; Koger, S.; Verhovsek, D. Temporal Microbial Dynamics in Feces Discriminate by Nutrition, Fecal Color, Consistency and Sample Type in Suckling and Newly Weaned Piglets. *Animals* **2023**, *13*, 2251. <https://doi.org/10.3390/ani13142251>

Academic Editor: Kelsy J. Robinson

Received: 6 June 2023

Revised: 5 July 2023

Accepted: 7 July 2023

Published: 9 July 2023

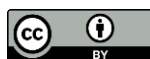

**Copyright:** © 2023 by the authors. Submitted for possible open access publication under the terms and conditions of the Creative Commons Attribution (CC BY) license (<https://creativecommons.org/licenses/by/4.0/>).

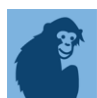

**Table S1.** Analyzed nutrient composition of the piglets and sow diet.

| Chemical Composition, % DM  | Milk                        |                       |                              |
|-----------------------------|-----------------------------|-----------------------|------------------------------|
|                             | Lactation Diet <sup>1</sup> | Replacer <sup>2</sup> | Prestarter Diet <sup>3</sup> |
| Dry matter, %               | 89.0                        | 94.8                  | 91.9                         |
| Crude ash                   | 5.5                         | 5.6                   | 5.5                          |
| Crude protein               | 17.9                        | 19.8                  | 20.5                         |
| Crude fibre                 | 5.8                         | 0.4                   | 5.2                          |
| Neutral-detergent fibre     | 17.3                        | 3.0                   | 15.2                         |
| Acid-detergent fibre        | 6.7                         | 0.6                   | 5.8                          |
| Acid-detergent lignin       | 1.8                         | 0.3                   | 1.5                          |
| Crude fat                   | 5.2                         | 7.8                   | 7.5                          |
| Nitrogen-free extract       | 65.7                        | 66.5                  | 61.6                         |
| Starch                      | 47.3                        | 29.4                  | 31.9                         |
| Sugar                       | 5.5                         | 26.8                  | 14.2                         |
| Metabolizable energy, MJ/kg | 14.7                        | 16.9                  | 15.3                         |

<sup>1</sup>ZuchtsauenKorn S Vital, Garant-Tiernahrung GmbH, Pöchlarn, Austria. Ingredient composition: corn, wheat, barley, soybean meal, sunflower meal, wheat bran, apple pomace, soybean oil, calcium carbonate, monocalcium phosphate, sodium chloride, magnesium phosphate, fish oil, L-cellulose, molasses. Vitamin and mineral composition per kg feed: 10,000 IU of vitamin A, 1,800 IU of vitamin D, 100 mg of Fe as iron(II) sulfate, 15 mg of Cu as copper(II) sulfate, 90 mg of Zn as zinc sulfate, 40 mg of Mn as manganese(II) oxide, 1.5 mg of I as calcium iodate, 0.4 mg of Se as sodium selenite. Technological additives: 500 FTU phytase, 2 mg of butylated hydroxyanisole, 10 mg of butylated hydroxytoluene, 2 mg of propyl gallate.

<sup>2</sup>Weanplus-4, Startix, Voorthuizen, The Netherlands. Ingredient composition: whey powder, starch, soy protein, plant protein, plant oil (coconut oil and palm oil). Vitamin and mineral composition per kg feed: 25,000 IU of vitamin A, 8,000 IU of vitamin D<sub>3</sub>, 200 mg of vitamin E, 140 mg of Cu as chelate of glycine hydrate, 108 mg of Fe as chelate of glycine hydrate, 3 mg of I as calcium iodate, 115 mg of Zn as chelate of glycine hydrate, 35 mg of Mn as glycine chelate, 0.3 mg of Se as sodium selenite. Technological additives: 5 g of citric acid, 1 g of calcium formiate. Mixing ratio: 200 g of powder mixed into 1 L of 40°C warm water.

<sup>3</sup>Ferkelabsetzkorn OGT, Garant-Tiernahrung GmbH, Pöchlarn, Austria. Ingredient composition: oat flakes, barley, wheat, whey powder, soy protein concentrate, wheat bran, sucrose, soybean meal, soy oil, corn gluten, L-cellulose, monocalcium phosphate, fish oil, sodium chloride, magnesium phosphate, calcium carbonate and molasses. Vitamin and mineral composition per kg feed: 16,000 IU of vitamin A, 2,000 IU of vitamin D<sub>3</sub>, 200 mg vitamin E, 120 mg Fe as iron(II) sulfate, 140 mg Cu as copper(II) sulfate, 120 mg Zn as zinc sulfate, 60 mg Mn as manganese(II) oxide, 1.5 mg I as calcium iodate, 0.5 mg Se as sodium selenite. Technological additives: 1,000 IU of phytase, 1,500 EPU of xylanase, 11 mg of beta hydroxy acid, 21 mg of butylated hydroxytoluene, 11 mg of propyl gallate.

**Table S2.** Oligonucleotide primers for quantification of total bacterial 16S rRNA, protozoal 18S rRNA, fungal 26S rRNA and archaeal 16S rRNA gene copies.

| Group                  |    | Primer sequence (5' to 3') <sup>1</sup> | Amplicon size (bp) | PCR Efficiency | Reference |
|------------------------|----|-----------------------------------------|--------------------|----------------|-----------|
| Total bacteria         | F: | CCTACGGGAGGCAGCAG                       | 193                | 95.3%          | [1]       |
|                        | R: | ATTACCGCGGCTGCTGG                       |                    |                |           |
| Total protozoa         | F: | GCTTTCGWTGGTAGTGATT                     | 233                | 99.6%          | [2]       |
|                        | R: | CTTGCCCTCYAATCGTWCT                     |                    |                |           |
| Total fungi and yeasts | F: | GCATATCAATAAGCGGAGGAAAAG                | 250                | 91.1%          | [3]       |
|                        | R: | ATTCCCAAACAACCTCGACTC                   |                    |                |           |
| Total archaea          | F: | CCGGAGATGGAACCTGAGAC                    | 160                | 99.6%          | [4]       |
|                        | R: | CGGTCTTGCCAGCTCTTATTC                   |                    |                |           |

<sup>1</sup>F, forward primer; R, reverse primer.

## References

1. Muyzer, G., De Waal, E.C., Uitterlinden, A.G. Profiling of complex microbial populations by denaturing gradient gel electrophoresis analysis of polymerase chain reaction-amplified genes coding for 16S rRNA. *Appl. Environ. Microbiol.* **1993**, *59*, 695–700.
2. Sylvester, J.T., Karnati, S. K. R., Yu, Z., Morrison, M., Firkins, J.L. Development of an assay to quantify rumen ciliate protozoal biomass in cows using real-time PCR. *J. Nutr.* **2004**, *134*, 3378–3384. doi:10.1093/jn/134.12.3378.
3. Urubschurov, V., Büsing, K., Janczyk, P., Souffrant, W.B., Zeyner, A. Development and evaluation of qPCR assay for quantitation of *Kazachstania slooffiae* and total yeasts occurring in the porcine gut. *Curr. Microbiol.* **2015**, *71*:373–381. doi:10.1007/s00284-015-0862-2.
4. Zhou, M., Hernandez-Sanabria, E., Guan, L.L. Assessment of the microbial ecology of ruminal methanogens in cattle with different feed efficiencies. *Appl. Environ. Microbiol.* **2009**, *75*, 6524–6533. doi:10.1128/AEM.02815-08.



**Table S3.** Descriptive statistics for average daily creep feed intake during the suckling period.\*

| Daily intake (g dry matter) | Mean | SE   | Minimum | Maximum | Median |
|-----------------------------|------|------|---------|---------|--------|
| DoL 10-16                   | 10   | 1.9  | 4       | 23      | 8      |
| DoL 17-23                   | 18   | 3.7  | 7       | 41      | 14     |
| DoL 24-25                   | 30   | 3.8  | 14      | 52      | 29     |
| DoL 26-28                   | 79   | 10.3 | 40      | 125     | 78     |

\*Creep feed consumption was estimated at litter level. DoL, day of life; SE, standard error of the mean. Piglets in the creep-fed group were offered the milk replacer from DoL 10 to 23, transitioned from the milk replacer to the prestarter on DoL 24 and 25 and were offered the prestarter diet to 100% from DoL 26. Piglets in the sow milk only group received the prestarter from weaning on day 28 of life.

**Table S4.** Body weight development of piglets selected for collection of feces.\*

| Item         | Sow milk | Creep feed | SEM  | litter_birth | P-value |            |
|--------------|----------|------------|------|--------------|---------|------------|
|              |          |            |      |              | diet    | sex × diet |
| Birth weight | 1.5      | -          | 0.07 | 0.017        | 0.010   | 0.956      |
| Day 2        | 1.6      | -          | 0.09 | 0.036        | 0.016   | 0.852      |
| Day 6        | 2.1      | -          | 0.16 | 0.059        | 0.001   | 0.682      |
| Day 13       | 4.4      | 3.4        | 0.23 | 0.239        | 0.013   | 0.566      |
| Day 20       | 6.4      | 5.4        | 0.36 | 0.474        | 0.083   | 0.735      |
| Day 27       | 8.6      | 7.1        | 0.47 | 0.172        | 0.067   | 0.742      |
| Day 30       | 8.8      | 7.2        | 0.45 | 0.165        | 0.044   | 0.837      |
| Day 34       | 8.9      | 7.2        | 0.45 | 0.39         | 0.030   | 0.909      |

\*Values are least squares means ± standard error of the mean (SEM). Piglets were weaned on day 28 of life.

9

10

11

12

13

**Table S5.** Age-related development of relative bacterial abundances (% of total reads) in feces from suckling and newly weaned piglets fed either only sow milk or additional creep feed from day 10 of life.\*

14  
15

| Day of Life (DoL)                    | 2     | 6     | 13    |       | 20   |       | 27   |       | 30   |       | 34   |       |            |        |       |       |
|--------------------------------------|-------|-------|-------|-------|------|-------|------|-------|------|-------|------|-------|------------|--------|-------|-------|
|                                      | Sow   | Sow   | Sow   | Creep | Sow  | Creep | Sow  | Creep | Sow  | Creep | Sow  | Creep | DoL ×      |        |       |       |
| Feeding (Feed)                       | Milk  | Milk  | Milk  | feed  | Milk | feed  | Milk | feed  | Milk | feed  | Milk | feed  | Pooled SEM | DoL    | Feed  | Feed  |
| <i>Lactobacillus</i>                 | 1.91  | 4.82  | 7.93  | 9.15  | 4.18 | 4.56  | 2.79 | 4.04  | 1.57 | 1.90  | 5.96 | 4.14  | 1.517      | <0.001 | 0.326 | 0.292 |
| <i>Escherichia Shigella</i>          | 38.11 | 24.91 | 22.52 | 27.49 | 9.64 | 12.99 | 6.34 | 6.01  | 7.40 | 4.99  | 2.12 | 2.52  | 3.299      | <0.001 | 0.516 | 0.912 |
| <i>Bacteroides</i>                   | 11.39 | 20.09 | 11.88 | 13.73 | 7.73 | 6.21  | 5.83 | 8.93  | 3.95 | 5.26  | 1.46 | 0.55  | 2.159      | <0.001 | 0.067 | 0.240 |
| <i>Prevotella</i>                    | 0.80  | 1.90  | 3.36  | 1.66  | 3.60 | 2.71  | 4.47 | 6.11  | 3.68 | 9.61  | 6.59 | 7.51  | 1.141      | <0.001 | 0.387 | 0.012 |
| <i>Actinobacillus</i>                | 3.99  | 1.67  | 0.44  | 0.66  | 0.55 | 0.12  | 0.18 | 1.44  | 0.16 | 0.58  | 0.08 | 0.04  | 0.833      | <0.001 | 0.332 | 0.595 |
| <i>Fusobacterium</i>                 | 13.65 | 9.32  | 1.27  | 0.67  | 0.82 | 2.95  | 5.08 | 8.37  | 1.84 | 3.12  | 0.88 | 0.06  | 1.881      | <0.001 | 0.809 | 0.374 |
| <i>Alloprevotella</i>                | 0.28  | 0.92  | 0.65  | 0.40  | 1.12 | 1.32  | 1.82 | 3.65  | 2.09 | 5.88  | 3.00 | 4.08  | 0.699      | <0.001 | 0.004 | 0.067 |
| <i>Rikenellaceae_RC9_gut_group</i>   | 0.09  | 0.25  | 2.42  | 1.47  | 7.54 | 4.91  | 9.30 | 4.63  | 4.25 | 2.17  | 3.01 | 4.57  | 1.039      | <0.001 | 0.026 | 0.072 |
| <i>Clostridium_sensu_stricto_1</i>   | 13.47 | 3.10  | 1.55  | 2.11  | 1.69 | 1.43  | 2.52 | 1.33  | 2.94 | 1.73  | 1.30 | 1.47  | 1.635      | <0.001 | 0.477 | 0.959 |
| <i>Streptococcus</i>                 | 2.97  | 2.26  | 1.95  | 0.88  | 0.77 | 0.45  | 1.47 | 1.75  | 2.48 | 1.22  | 0.20 | 0.08  | 0.676      | <0.001 | 0.524 | 0.706 |
| <i>Lachnospirillum</i>               | 0.79  | 6.61  | 6.11  | 5.21  | 4.76 | 3.78  | 5.28 | 4.17  | 2.60 | 2.93  | 0.68 | 0.52  | 1.099      | <0.001 | 0.827 | 0.199 |
| <i>Phascolarctobacterium</i>         | 0.07  | 0.31  | 1.44  | 0.64  | 2.42 | 2.02  | 2.28 | 3.08  | 2.73 | 3.75  | 2.89 | 3.75  | 0.424      | <0.001 | 0.543 | 0.165 |
| <i>Campylobacter</i>                 | 0.94  | 0.81  | 1.45  | 1.39  | 0.80 | 1.36  | 0.99 | 1.49  | 3.20 | 2.91  | 4.00 | 2.02  | 0.763      | 0.006  | 0.667 | 0.432 |
| <i>Megasphaera</i>                   | 0.07  | 0.14  | 0.18  | 0.48  | 0.82 | 1.15  | 1.82 | 2.75  | 2.16 | 1.92  | 4.46 | 3.52  | 0.879      | <0.001 | 0.954 | 0.971 |
| <i>Christensenellaceae_R_7_group</i> | 0.04  | 0.18  | 0.73  | 1.15  | 7.30 | 6.14  | 4.18 | 2.74  | 4.03 | 1.36  | 4.27 | 2.87  | 0.861      | <0.001 | 0.044 | 0.560 |
| <i>Prevotellaceae_NK3B31_group</i>   | 0.03  | 0.34  | 0.67  | 0.10  | 0.61 | 0.92  | 0.84 | 1.66  | 1.98 | 2.71  | 3.03 | 2.57  | 0.406      | <0.001 | 0.705 | 0.463 |
| <i>Oscillospiraceae_UCG_002</i>      | 0.03  | 0.89  | 2.10  | 2.59  | 5.29 | 2.05  | 2.37 | 1.75  | 2.74 | 2.14  | 2.95 | 3.13  | 0.540      | <0.001 | 0.044 | 0.018 |
| <i>Roseburia</i>                     | 0.14  | 0.16  | 0.43  | 0.32  | 0.77 | 1.50  | 1.17 | 0.99  | 1.99 | 1.99  | 1.93 | 1.69  | 0.402      | <0.001 | 0.870 | 0.927 |
| <i>NK4A214_group</i>                 | 0.02  | 0.21  | 1.33  | 1.19  | 2.46 | 1.57  | 1.45 | 0.82  | 2.09 | 1.51  | 2.27 | 2.50  | 0.312      | <0.001 | 0.134 | 0.481 |
| <i>Moraxella</i>                     | 0.22  | 0.05  | 0.03  | 0.04  | 0.01 | 0.02  | 0    | 0     | 0.01 | 0.01  | 0    | 0     | 0.047      | <0.001 | 0.056 | 0.002 |
| <i>Veillonella</i>                   | 1.09  | 1.00  | 0.22  | 0.46  | 0.17 | 0.21  | 0.16 | 0.24  | 0.04 | 0.09  | 0.06 | 0     | 0.149      | <0.001 | 0.883 | 0.717 |
| <i>Enterococcus</i>                  | 0.68  | 2.33  | 3.67  | 3.18  | 0.73 | 1.66  | 1.03 | 0.78  | 0.07 | 0.05  | 0.08 | 0.12  | 0.585      | <0.001 | 0.972 | 0.919 |

| Day of Life (DoL)             | 2    | 6    | 13   |       | 20   |       | 27   |       | 30   |       | 34   |       |            |        |       |       |
|-------------------------------|------|------|------|-------|------|-------|------|-------|------|-------|------|-------|------------|--------|-------|-------|
|                               | Sow  | Sow  | Sow  | Creep | DoL ×      |        |       |       |
| Feeding (Feed)                | Milk | Milk | Milk | feed  | Pooled SEM | DoL    | Feed  | Feed  |
| Family_XIII_AD3011_group      | 0.01 | 0.04 | 0.44 | 0.06  | 1.29 | 0.93  | 1.31 | 0.85  | 1.46 | 1.59  | 1.70 | 1.85  | 0.253      | <0.001 | 0.325 | 0.779 |
| Desulfovibrio                 | 0.08 | 0.63 | 0.83 | 0.62  | 0.97 | 0.77  | 1.26 | 1.03  | 0.80 | 0.83  | 0.66 | 0.63  | 0.149      | <0.001 | 0.154 | 0.867 |
| Lachnospiraceae_NK4A136_group | 0    | 0.01 | 0.01 | 0.01  | 0.42 | 0.31  | 0.16 | 0.98  | 1.94 | 3.19  | 1.41 | 1.82  | 0.345      | <0.001 | 0.072 | 0.344 |
| Colidextribacter              | 0.06 | 0.41 | 0.34 | 0.65  | 0.68 | 0.69  | 0.80 | 0.58  | 0.65 | 0.66  | 0.59 | 0.81  | 0.137      | <0.001 | 0.833 | 0.424 |
| Ruminococcus                  | 0.08 | 0.59 | 0.54 | 0.78  | 0.86 | 1.05  | 1.33 | 1.30  | 1.46 | 1.50  | 0.80 | 1.24  | 0.242      | <0.001 | 0.567 | 0.858 |
| Rothia                        | 0.08 | 0.07 | 0.04 | 0.05  | 0.04 | 0.04  | 0.01 | 0.01  | 0.01 | 0     | 0    | 0     | 0.016      | <0.001 | 0.205 | 0.128 |
| Subdoligranulum               | 0.02 | 0.11 | 0.15 | 0.55  | 0.98 | 0.32  | 0.69 | 1.47  | 0.57 | 1.61  | 1.23 | 1.60  | 0.274      | <0.001 | 0.078 | 0.045 |
| Mitsuokella                   | 0.06 | 0.02 | 0.02 | 0.01  | 0.23 | 0.14  | 0.64 | 0.63  | 0.51 | 0.67  | 3.74 | 1.63  | 0.579      | <0.001 | 0.364 | 0.453 |
| Oscillibacter                 | 0.01 | 0.02 | 0.23 | 0.06  | 0.98 | 0.88  | 1.20 | 0.89  | 0.72 | 0.90  | 0.51 | 0.61  | 0.209      | <0.001 | 0.749 | 0.915 |
| Butyricimonas                 | 0.04 | 0.48 | 1.85 | 0.79  | 0.91 | 0.41  | 0.71 | 0.61  | 0.35 | 0.21  | 0.05 | 0.02  | 0.221      | <0.001 | 0.027 | 0.164 |
| Coprococcus                   | 0.05 | 0.08 | 0.07 | 0.30  | 0.80 | 0.32  | 1.19 | 0.39  | 1.40 | 1.10  | 1.46 | 3.03  | 0.323      | <0.001 | 0.900 | 0.016 |
| Parabacteroides               | 0.30 | 0.80 | 1.28 | 0.25  | 0.58 | 0.82  | 0.28 | 0.39  | 0.81 | 0.41  | 0.78 | 0.41  | 0.261      | 0.315  | 0.013 | 0.096 |
| Helicobacter                  | 0.03 | 0.10 | 0.15 | 0.24  | 0.27 | 2.90  | 0.39 | 0.63  | 1.32 | 1.49  | 0.61 | 0.38  | 0.524      | 0.006  | 0.200 | 0.086 |
| Agathobacter                  | 0    | 0.02 | 0.04 | 0.00  | 0    | 0     | 0    | 0.24  | 0.70 | 1.01  | 1.34 | 2.23  | 0.233      | <0.001 | 0.221 | 0.333 |
| Terrisporobacter              | 0.39 | 0.10 | 0.32 | 0.25  | 0.14 | 0.74  | 0.20 | 0.23  | 0.66 | 0.95  | 0.44 | 0.59  | 0.177      | 0.004  | 0.293 | 0.220 |
| Prevotellaceae_UCG_001        | 0    | 0.01 | 0.64 | 0.14  | 0.28 | 0.88  | 0.49 | 0.74  | 0.61 | 0.47  | 0.36 | 0.59  | 0.323      | 0.157  | 0.796 | 0.655 |
| Tuzzerella                    | 0.08 | 0.21 | 0.23 | 0.15  | 0.37 | 1.27  | 0.46 | 0.57  | 0.32 | 0.56  | 0.83 | 0.89  | 0.259      | 0.007  | 0.308 | 0.468 |
| Romboutsia                    | 0.19 | 0.08 | 0.32 | 0.32  | 0.29 | 0.30  | 0.23 | 0.39  | 0.41 | 0.21  | 0.03 | 0.03  | 0.112      | 0.040  | 0.407 | 0.408 |
| Blautia                       | 0.01 | 0.08 | 0.05 | 0.05  | 0.31 | 0.21  | 0.29 | 0.61  | 0.76 | 1.18  | 1.87 | 2.54  | 0.255      | <0.001 | 0.229 | 0.644 |
| Dorea                         | 0.04 | 0.08 | 0.24 | 0.34  | 1.10 | 0.60  | 0.43 | 0.63  | 0.62 | 0.66  | 0.68 | 0.94  | 0.157      | <0.001 | 0.922 | 0.274 |
| Porphyromonas                 | 0.05 | 0.32 | 0.47 | 0.17  | 0    | 0.02  | 0.18 | 0.00  | 0.36 | 0.06  | 0.05 | 0.01  | 0.158      | 0.152  | 0.133 | 0.822 |
| Alistipes                     | 0.01 | 0.33 | 0.90 | 0.91  | 0.71 | 0.15  | 0.79 | 0.82  | 0.32 | 0.30  | 0.01 | 0.05  | 0.188      | <0.001 | 0.472 | 0.633 |
| Lachnospiraceae_AC2044_group  | 0    | 0.01 | 0.03 | 0.07  | 0.39 | 0.63  | 0.08 | 0.04  | 0.50 | 1.61  | 0.64 | 0.99  | 0.200      | <0.001 | 0.033 | 0.054 |

\*Values are least squares means ± pooled standard error of the mean (SEM). Piglets were weaned on day 28 of life. Proportional abundances are presented that represent >0.2% of all reads.

**Table S6.** Differences in relative bacterial abundances (% of total reads) in feces of different colors and consistencies obtained from suckling and newly weaned piglets during the suckling and early postweaning phase.\*

| Day of Life (DoL)                    | 2     | 2        | 2      | 2      | 2      | 6     | 6      | 6      | 13    | 13    | 13     | 13     | 20    | 20        | 20    | 20    | 20    | 20     | 20        | 20     |
|--------------------------------------|-------|----------|--------|--------|--------|-------|--------|--------|-------|-------|--------|--------|-------|-----------|-------|-------|-------|--------|-----------|--------|
| Color                                | brown | brown    | yellow | yellow | yellow | brown | yellow | yellow | brown | brown | yellow | yellow | brown | brown     | brown | grey  | grey  | yellow | yellow    | yellow |
| Consistency                          | balls | meconium | balls  | soft   | soft   | balls | balls  | soft   | balls | soft  | balls  | soft   | balls | very soft | soft  | balls | soft  | balls  | very soft | soft   |
| <i>Lactobacillus</i>                 | 0     | 0        | 2.94   | 3.29   | 3.46   | 0     | 5.86   | 5.10   | 11.47 | 0.58  | 7.99   | 0      | 4.92  | 0.25      | 0     | 5.14  | 0     | 4.83   | 5.70      | 2.44   |
| <i>Escherichia_Shigella</i>          | 43.84 | 59.35    | 34.00  | 18.67  | 23.54  | 27.82 | 24.84  | 10.97  | 23.75 | 11.65 | 26.69  | 6.68   | 15.93 | 5.62      | 4.04  | 5.18  | 5.51  | 12.79  | 2.19      | 7.70   |
| <i>Bacteroides</i>                   | 11.91 | 8.40     | 11.41  | 5.72   | 21.10  | 14.60 | 20.73  | 26.50  | 16.56 | 0.80  | 11.95  | 6.49   | 2.54  | 3.65      | 14.33 | 2.59  | 2.86  | 7.45   | 13.70     | 6.74   |
| <i>Prevotella</i>                    | 0.33  | 0.46     | 1.14   | 0.24   | 0.17   | 3.88  | 1.54   | 2.39   | 1.58  | 26.89 | 1.80   | 7.64   | 8.14  | 0.45      | 1.12  | 5.89  | 2.03  | 1.73   | 0.75      | 8.01   |
| <i>Actinobacillus</i>                | 1.58  | 1.08     | 4.33   | 9.25   | 8.77   | 0.85  | 1.80   | 2.91   | 0.31  | 0     | 0.70   | 0.71   | 0.77  | 0.97      | 0.33  | 0.72  | 0.68  | 0.20   | 0.39      | 0.06   |
| <i>Fusobacterium</i>                 | 9.62  | 7.22     | 15.30  | 7.42   | 26.81  | 9.40  | 8.96   | 21.15  | 1.49  | 0     | 0.97   | 0      | 0.25  | 0         | 0     | 0     | 0     | 0.87   | 18.89     | 0.70   |
| <i>Alloprevotella</i>                | 0.43  | 0.26     | 0.30   | 0      | 0.19   | 2.14  | 0.70   | 0.65   | 0.42  | 4.29  | 0.38   | 1.99   | 0.92  | 7.92      | 0.38  | 5.33  | 0.72  | 0.88   | 0.55      | 2.03   |
| <i>Rikenellaceae_RC9_gut_group</i>   | 0     | 0        | 0.61   | 2.02   | 0      | 0     | 0.50   | 0.87   | 1.56  | 6.44  | 1.35   | 17.78  | 7.40  | 1.09      | 12.55 | 11.37 | 0.99  | 5.74   | 2.22      | 11.43  |
| <i>Clostridium_sensu_stricto_1</i>   | 23.32 | 3.61     | 12.41  | 47.72  | 5      | 9.49  | 2.05   | 0      | 2.43  | 0.64  | 1.67   | 0.87   | 3.02  | 1.29      | 3.22  | 1.13  | 1.26  | 1.43   | 0.42      | 0.57   |
| <i>Streptococcus</i>                 | 3.24  | 0.62     | 4.05   | 0.75   | 1.13   | 2.73  | 2.12   | 3.88   | 1.62  | 0     | 1.43   | 0.29   | 1.51  | 0.88      | 0.43  | 0.67  | 0.76  | 0.41   | 0.61      | 0.34   |
| <i>Lachnospirillum</i>               | 0.16  | 0        | 1.04   | 0.80   | 1.79   | 4.74  | 6.90   | 5.92   | 5.31  | 4.30  | 5.89   | 4.68   | 3.73  | 0         | 5.01  | 2.21  | 1.00  | 4.88   | 2.83      | 5.02   |
| <i>Phascolarctobacterium</i>         | 0     | 0        | 0.13   | 0.32   | 0      | 0.02  | 0.36   | 0.30   | 0.69  | 3.96  | 1.06   | 1.36   | 2.40  | 3.83      | 1.99  | 2.40  | 2.08  | 2.01   | 2.50      | 2.81   |
| <i>Campylobacter</i>                 | 0     | 0        | 1.71   | 0.29   | 0.25   | 0     | 0.98   | 0.64   | 1.42  | 0     | 1.41   | 3.41   | 0.74  | 0.51      | 0.87  | 0.23  | 0.0   | 1.24   | 1.54      | 0.89   |
| <i>Megasphaera</i>                   | 0.08  | 0.27     | 0.02   | 0      | 0.11   | 0.56  | 0.07   | 0      | 0.07  | 0.15  | 0.44   | 0.38   | 3.34  | 0.44      | 0.11  | 0.18  | 0.23  | 0.67   | 0.12      | 0.63   |
| <i>Christensenellaceae_R_7_group</i> | 0     | 0        | 0.29   | 0.58   | 0      | 0     | 0.21   | 0.55   | 0.88  | 0.22  | 1.03   | 0      | 3.10  | 11.77     | 10.43 | 12.48 | 25.37 | 7.25   | 2.21      | 3.18   |
| <i>Prevotellaceae_NK3B31_group</i>   | 0.01  | 0        | 0.11   | 0.13   | 0      | 0.03  | 0.40   | 0.35   | 0.16  | 9.38  | 0.15   | 0.10   | 0.24  | 1.96      | 0     | 2.34  | 6.50  | 0.59   | 0         | 1.62   |
| <i>UCG_002</i>                       | 0     | 0        | 0.11   | 0.24   | 0      | 0.82  | 0.88   | 1.90   | 2.29  | 1.08  | 2.49   | 0.42   | 2.06  | 1.71      | 11.08 | 2.52  | 0.88  | 3.95   | 2.12      | 5.63   |
| <i>Roseburia</i>                     | 0.01  | 0        | 0.21   | 0      | 0.29   | 0.02  | 0.17   | 0.47   | 0.70  | 0.06  | 0.26   | 0.09   | 0.29  | 1.03      | 0     | 0.58  | 0.36  | 1.07   | 5.04      | 0.33   |
| <i>NK4A214_group</i>                 | 0     | 0        | 0.02   | 0      | 0.10   | 0.17  | 0.23   | 0      | 1.51  | 1.76  | 1.14   | 1.20   | 1.54  | 5.14      | 2.72  | 1.00  | 2.49  | 2.07   | 1.07      | 2.28   |
| <i>Moraxella</i>                     | 0.17  | 0.07     | 0.12   | 1.47   | 0.57   | 0     | 0.06   | 0.04   | 0.02  | 0     | 0.04   | 0      | 0.01  | 0         | 0     | 0     | 0     | 0.02   | 0         | 0      |
| <i>Veillonella</i>                   | 1.51  | 0.65     | 1.10   | 0.77   | 1.52   | 1.55  | 0.91   | 0.75   | 0.24  | 0.87  | 0.36   | 0.43   | 0.08  | 0.23      | 0.06  | 0.23  | 0.07  | 0.18   | 0.44      | 0.29   |

| Day of Life (DoL)             | 2     | 2        | 2      | 2      | 2              | 6     | 6      | 6      | 13    | 13    | 13     | 13     | 20    | 20        | 20    | 20    | 20   | 20     | 20        | 20     |
|-------------------------------|-------|----------|--------|--------|----------------|-------|--------|--------|-------|-------|--------|--------|-------|-----------|-------|-------|------|--------|-----------|--------|
| Color                         | brown | brown    | yellow | yellow | very<br>yellow | brown | yellow | yellow | brown | brown | yellow | yellow | brown | brown     | brown | grey  | grey | yellow | yellow    | yellow |
| Consistency                   | balls | meconium | balls  | soft   | soft           | balls | balls  | soft   | balls | soft  | balls  | soft   | balls | very soft | soft  | balls | soft | balls  | very soft | soft   |
| Enterococcus                  | 1.25  | 1.89     | 0.33   | 0      | 0.49           | 3.39  | 2.23   | 0      | 3.07  | 1.03  | 3.76   | 0.75   | 1.01  | 1.11      | 0.79  | 0.97  | 1.09 | 1.47   | 0.32      | 0.48   |
| Family_XIII_AD3011_group      | 0     | 0.01     | 0.02   | 0      | 0              | 0.02  | 0.04   | 0.02   | 0.04  | 1.58  | 0.19   | 2.90   | 0.33  | 8.79      | 0.43  | 1.86  | 1.50 | 0.94   | 0.23      | 2.13   |
| Desulfovibrio                 | 0     | 0.0      | 0.16   | 0.08   | 0              | 0.83  | 0.62   | 0.07   | 0.79  | 1.46  | 0.62   | 2.10   | 0.41  | 0.95      | 2.39  | 0.90  | 0.67 | 0.73   | 1.60      | 1.77   |
| Lachnospiraceae_NK4A136_group | 0     | 0.0      | 0.06   | 0.15   | 0              | 0     | 0.03   | 0.13   | 0     | 0     | 0.04   | 0      | 0.06  | 3.21      | 0     | 1.45  | 0.83 | 0.32   | 0         | 0.39   |
| Colidextribacter              | 0.02  | 0.02     | 0.10   | 0      | 0.02           | 0.46  | 0.37   | 1.51   | 0.59  | 1.49  | 0.43   | 0.08   | 0.28  | 0.42      | 0.28  | 1.26  | 0.87 | 0.72   | 1.15      | 0.71   |
| Ruminococcus                  | 0     | 0        | 0.16   | 0.15   | 0              | 0.45  | 0.55   | 3.04   | 0.39  | 0.34  | 0.79   | 0.30   | 0.71  | 0.58      | 2.52  | 1.41  | 1.01 | 1.01   | 0.39      | 0.99   |
| Rothia                        | 0.08  | 0.06     | 0.08   | 0.18   | 0.06           | 0.13  | 0.06   | 0.01   | 0.05  | 0.04  | 0.05   | 0      | 0.04  | 0.04      | 0.04  | 0.02  | 0.07 | 0.04   | 0.02      | 0.06   |
| Subdoligranulum               | 0.03  | 0.04     | 0.01   | 0.01   | 0.02           | 0.12  | 0.12   | 0      | 0.28  | 0.17  | 0.34   | 1.37   | 0.19  | 0.13      | 5.17  | 0.46  | 0.81 | 0.71   | 0.09      | 0.41   |
| Mitsuokella                   | 0.13  | 0.25     | 0      | 0.08   | 0.04           | 0.09  | 0.01   | 0      | 0.04  | 0.06  | 0.02   | 0      | 0.35  | 0         | 0.05  | 0.17  | 0.11 | 0.19   | 0.02      | 0.19   |
| Oscillibacter                 | 0     | 0.08     | 0      | 0      | 0.01           | 0.09  | 0.02   | 0      | 0.10  | 1.46  | 0.08   | 1.02   | 0.12  | 0.78      | 0.20  | 1.83  | 5.54 | 0.68   | 0.16      | 3.79   |
| Butyricimonas                 | 0     | 0        | 0.10   | 0.11   | 0              | 1.25  | 0.34   | 0.55   | 0.77  | 1.13  | 1.20   | 10.74  | 0.11  | 0         | 2.49  | 0     | 0.13 | 0.81   | 0.27      | 0.96   |
| Coprococcus                   | 0     | 0        | 0.08   | 0.05   | 0              | 0     | 0.10   | 0.04   | 0.19  | 0     | 0.20   | 0      | 0.45  | 0.81      | 1.29  | 0     | 1.79 | 0.60   | 0.11      | 0.37   |
| Parabacteroides               | 0.20  | 0.40     | 0.33   | 0      | 0.23           | 0.79  | 0.80   | 1.05   | 0.54  | 0.05  | 0.91   | 0.09   | 0.04  | 0.20      | 0.09  | 7.03  | 7.27 | 0.47   | 0.19      | 0.46   |
| Helicobacter                  | 0.04  | 0.05     | 0.04   | 0      | 0.07           | 0     | 0.13   | 0.03   | 0.06  | 0.14  | 0.20   | 1.54   | 0.04  | 0.46      | 0.03  | 0.13  | 0.30 | 2.41   | 0.22      | 1.22   |
| Agathobacter                  | 0     | 0.05     | 0.01   | 0.07   | 0.03           | 0     | 0.06   | 0.05   | 0.05  | 0     | 0.02   | 0      | 0.03  | 0         | 0.05  | 0.0   | 0.04 | 0.00   | 0.08      | 0      |
| Terrisporobacter              | 0.23  | 0.17     | 0.35   | 2.28   | 0.18           | 0.21  | 0.09   | 0      | 0.19  | 0.13  | 0.33   | 0.13   | 1.35  | 0.39      | 0.12  | 0.15  | 0.68 | 0.31   | 0.11      | 0.06   |
| Prevotellaceae_UCG_001        | 0.25  | 0.18     | 0      | 0.12   | 0              | 0.23  | 0      | 0.02   | 1.29  | 0     | 0.05   | 0.20   | 0.25  | 0.22      | 0.48  | 0.16  | 0.23 | 0.79   | 0.13      | 0.39   |
| Tuzzerella                    | 0     | 0        | 0.22   | 0.04   | 0              | 0.07  | 0.22   | 0.80   | 0.18  | 0.30  | 0.18   | 0.15   | 0.59  | 0.32      | 0     | 0.10  | 0.29 | 0.24   | 6.61      | 1.04   |
| Romboutsia                    | 0.10  | 1.01     | 0      | 0      | 0.04           | 0.07  | 0.09   | 0      | 0.32  | 0.11  | 0.34   | 0.10   | 0.55  | 0.35      | 0.30  | 0.19  | 0.70 | 0.24   | 0.08      | 0.32   |
| Blautia                       | 0.09  | 0.07     | 0      | 0      | 0.03           | 0.27  | 0.05   | 0      | 0.11  | 0.09  | 0.03   | 0.09   | 0.46  | 0.09      | 0.46  | 0.09  | 0.09 | 0.28   | 0.05      | 0.03   |
| Dorea                         | 0.0   | 0.0      | 0.09   | 0      | 0.02           | 0.02  | 0.10   | 0      | 0.21  | 0.59  | 0.30   | 0.84   | 0.43  | 0         | 0.69  | 0.02  | 0.97 | 0.98   | 0.37      | 1.70   |
| Porphyromonas                 | 0.08  | 0.06     | 0.05   | 0      | 0.11           | 0.07  | 0.41   | 0      | 0.10  | 0.10  | 0.42   | 0.06   | 0.02  | 0.12      | 0.06  | 0     | 0    | 0      | 0.07      | 0.06   |
| Alistipes                     | 0     | 0        | 0.09   | 0.28   | 0.06           | 0.37  | 0.32   | 0.46   | 0.80  | 0.23  | 1.00   | 0.25   | 0.23  | 0.13      | 1.01  | 0.0   | 0.58 | 0.46   | 0         | 1.26   |
| Lachnospiraceae_AC2044_group  | 0     | 0.02     | 0.01   | 0.00   | 0.03           | 0.03  | 0.01   | 0      | 0     | 0.23  | 0.06   | 0.11   | 0.12  | 1.35      | 0.06  | 1.39  | 0.46 | 0.66   | 0         | 0.31   |

| Day of Life (DoL)                    | 27    | 27       | 27    | 27    | 27     | 27       | 27     | 30    | 30       | 30    | 30     | 30     | 34    | 34       | 34    | 34     | 34     |        |
|--------------------------------------|-------|----------|-------|-------|--------|----------|--------|-------|----------|-------|--------|--------|-------|----------|-------|--------|--------|--------|
| Color                                | brown | brown    | brown | grey  | yellow | yellow   | yellow | brown | brown    | brown | yellow | yellow | brown | brown    | brown | yellow | yellow | Pooled |
| Consistency                          | balls | diarrhea | soft  | soft  | balls  | diarrhea | soft   | balls | diarrhea | soft  | balls  | soft   | balls | diarrhea | soft  | balls  | soft   | SEM    |
| <i>Lactobacillus</i>                 | 1.73  | 4.01     | 3.49  | 0.32  | 3.49   | 5.50     | 3.40   | 1.96  | 0.65     | 1.18  | 2.70   | 1.59   | 2.92  | 9.79     | 2.20  | 1.07   | 6.11   | 3.960  |
| <i>Escherichia_Shigella</i>          | 8.48  | 4.11     | 1.90  | 8.38  | 6.58   | 2.81     | 8.10   | 4.55  | 9.68     | 0     | 8.78   | 5.51   | 0     | 3.63     | 7.19  | 3.59   | 13.66  | 8.029  |
| <i>Bacteroides</i>                   | 5.02  | 6.61     | 11.85 | 10.21 | 8.07   | 2.76     | 8.06   | 2.63  | 0.74     | 2.42  | 11.72  | 3.16   | 1.61  | 1.03     | 0.00  | 11.38  | 0      | 5.547  |
| <i>Prevotella</i>                    | 1.96  | 11.69    | 5.67  | 29.05 | 2.28   | 11.10    | 5.87   | 8.01  | 6.38     | 15.96 | 2.67   | 6.28   | 7.20  | 5.98     | 9.16  | 0.19   | 10.13  | 2.505  |
| <i>Actinobacillus</i>                | 0.62  | 1.40     | 1.41  | 0.61  | 0.87   | 0.45     | 0.49   | 0.11  | 0.70     | 0.30  | 0.37   | 0.62   | 0.12  | 0        | 0.22  | 0.55   | 0      | 2.095  |
| <i>Fusobacterium</i>                 | 1.21  | 5.25     | 0.10  | 0     | 7.69   | 18.70    | 5.66   | 1.26  | 0.48     | 2.04  | 6.16   | 2.46   | 1.28  | 0.29     | 0.00  | 3.48   | 0      | 4.641  |
| <i>Alloprevotella</i>                | 1.18  | 11.06    | 3.59  | 6.14  | 1.89   | 3.12     | 1.16   | 3.03  | 6.93     | 0.83  | 3.17   | 3.53   | 2.89  | 4.62     | 3.28  | 3.67   | 2.24   | 1.735  |
| <i>Rikenellaceae_RC9_gut_group</i>   | 13.09 | 2.89     | 6.08  | 6.65  | 6.84   | 2.71     | 7.61   | 3.45  | 1.97     | 4.85  | 3.70   | 3.17   | 2.79  | 3.81     | 5.39  | 3.36   | 6.78   | 2.670  |
| <i>Clostridium_sensu_stricto_1</i>   | 5.84  | 0.82     | 1.72  | 0.40  | 2.01   | 0.34     | 0.40   | 2.71  | 1.72     | 2.52  | 2.50   | 1.44   | 1.43  | 1.06     | 2.29  | 0.00   | 0.72   | 3.848  |
| <i>Streptococcus</i>                 | 0.83  | 0.51     | 0.63  | 0.47  | 2.90   | 0.50     | 0.36   | 1.77  | 1.64     | 0.50  | 2.66   | 0.38   | 0.19  | 0        | 0.42  | 0.18   | 0      | 1.747  |
| <i>Lachnospiraceae</i>               | 4.38  | 0.99     | 1.48  | 2.10  | 4.15   | 1.28     | 12.97  | 1.92  | 1.52     | 1.14  | 5.49   | 3.19   | 0.92  | 0.47     | 0.12  | 0.58   | 0.78   | 2.767  |
| <i>Phascolarctobacterium</i>         | 3.29  | 3.07     | 8.13  | 5.69  | 1.36   | 3.13     | 2.40   | 2.32  | 5.50     | 3.87  | 1.91   | 4.03   | 3.05  | 3.78     | 3.74  | 1.59   | 0.56   | 1.008  |
| <i>Campylobacter</i>                 | 1.25  | 1.54     | 0.72  | 0.61  | 1.65   | 0.40     | 0.76   | 5.34  | 1.35     | 0.69  | 2.72   | 0.58   | 2.71  | 1.86     | 1.05  | 37.59  | 0.34   | 1.543  |
| <i>Megasphaera</i>                   | 0.91  | 3.04     | 4.92  | 3.63  | 0.85   | 4.20     | 4.54   | 1.95  | 3.65     | 0.29  | 1.18   | 0.36   | 1.36  | 7.20     | 4.99  | 0      | 0.26   | 2.202  |
| <i>Christensenellaceae_R_7_group</i> | 5.73  | 0        | 3.90  | 0.00  | 4.33   | 1.28     | 2.76   | 2.87  | 1.00     | 3.37  | 3.73   | 5.42   | 4.07  | 3.43     | 3.16  | 2.16   | 0.27   | 2.144  |
| <i>Prevotellaceae_NK3B31_group</i>   | 1.83  | 6.03     | 2.14  | 6.22  | 0.30   | 0.67     | 0.34   | 2.56  | 2.80     | 5.14  | 0.72   | 3.74   | 2.53  | 2.17     | 4.43  | 0.13   | 4.97   | 0.873  |
| UCG_002                              | 3.74  | 0.32     | 1.16  | 0.29  | 1.88   | 4.34     | 1.31   | 1.55  | 2.60     | 4.30  | 3.00   | 1.35   | 2.99  | 2.65     | 3.59  | 0.46   | 6.92   | 1.487  |
| <i>Roseburia</i>                     | 0.61  | 4.03     | 2.64  | 0.46  | 0.38   | 0.79     | 1.61   | 1.66  | 3.78     | 0.93  | 0.89   | 2.09   | 1.68  | 1.87     | 2.14  | 0.30   | 2.03   | 0.981  |
| <i>NK4A214_group</i>                 | 1.26  | 0.78     | 0.54  | 0.32  | 1.21   | 0.83     | 1.61   | 2.16  | 1.90     | 2.13  | 0.82   | 5.46   | 2.92  | 2.22     | 1.83  | 0.38   | 2.54   | 0.798  |
| <i>Moraxella</i>                     | 0.01  | 0        | 0.02  | 0     | 0.01   | 0        | 0      | 0     | 0        | 0.01  | 0.02   | 0.02   | 0.01  | 0.01     | 0     | 0.01   | 0      | 0.109  |
| <i>Veillonella</i>                   | 0.04  | 0.70     | 0.47  | 0.34  | 0.07   | 0.31     | 0.23   | 0.01  | 0.17     | 0.03  | 0.03   | 0.05   | 0     | 0.08     | 0.01  | 0.05   | 0.02   | 0.386  |
| <i>Enterococcus</i>                  | 0     | 1.03     | 0.41  | 1.11  | 1.62   | 0.0      | 0.49   | 0.19  | 1.04     | 0     | 0      | 0      | 0     | 0.12     | 1.06  | 0      | 1.03   | 1.519  |
| <i>Family_XIII_AD3011_group</i>      | 1.58  | 2.00     | 0.63  | 0.34  | 0.94   | 1.35     | 0.78   | 1.43  | 1.72     | 0.77  | 1.42   | 4.12   | 2.16  | 1.73     | 0.67  | 4.88   | 1.82   | 0.563  |
| <i>Desulfovibrio</i>                 | 1.23  | 0.93     | 1.27  | 1.58  | 0.94   | 1.17     | 1.66   | 0.50  | 0.75     | 1.22  | 1.14   | 1.29   | 0.67  | 0.42     | 0.81  | 1.28   | 1.01   | 0.377  |
| <i>Lachnospiraceae_NK4A136_group</i> | 0.18  | 0.17     | 4.33  | 0     | 0.49   | 0.02     | 0      | 2.25  | 3.04     | 8.38  | 0.58   | 6.29   | 1.59  | 1.08     | 2.78  | 1.02   | 0.30   | 0.745  |

| Day of Life (DoL)                   | 27    | 27       | 27    | 27   | 27     | 27       | 27     | 30    | 30       | 30    | 30     | 30     | 34    | 34       | 34    | 34     | 34     |        |
|-------------------------------------|-------|----------|-------|------|--------|----------|--------|-------|----------|-------|--------|--------|-------|----------|-------|--------|--------|--------|
| Color                               | brown | brown    | brown | grey | yellow | yellow   | yellow | brown | brown    | brown | yellow | yellow | brown | brown    | brown | yellow | yellow | Pooled |
| Consistency                         | balls | diarrhea | soft  | soft | balls  | diarrhea | soft   | balls | diarrhea | soft  | balls  | soft   | balls | diarrhea | soft  | balls  | soft   | SEM    |
| <i>Colidextribacter</i>             | 0.68  | 0.85     | 0.93  | 0.18 | 0.74   | 1.21     | 0.11   | 0.58  | 0.63     | 0.69  | 0.60   | 2.25   | 0.87  | 0.77     | 0.32  | 0.26   | 0.77   | 0.350  |
| <i>Ruminococcus</i>                 | 3.92  | 0.24     | 2.34  | 0.09 | 1.32   | 0.04     | 0.18   | 1.72  | 0.82     | 2.21  | 1.55   | 2.16   | 1.26  | 0.59     | 1.39  | 0      | 0.94   | 0.571  |
| <i>Rothia</i>                       | 0.01  | 0        | 0.02  | 0    | 0.02   | 0.00     | 0.01   | 0.01  | 0        | 0.01  | 0.02   | 0.01   | 0.01  | 0        | 0     | 0.02   | 0      | 0.042  |
| <i>Subdoligranulum</i>              | 1.60  | 0.51     | 1.54  | 0.14 | 1.17   | 0.55     | 0.94   | 1.26  | 0.59     | 4.10  | 0.64   | 0.13   | 1.66  | 1.45     | 1.21  | 0.14   | 0.66   | 0.700  |
| <i>Mitsuokella</i>                  | 0.24  | 1.48     | 0.97  | 0.19 | 0.23   | 1.49     | 1.09   | 0.31  | 1.35     | 1.19  | 0.04   | 0.44   | 2.06  | 3.89     | 2.69  | 0      | 0.06   | 1.549  |
| <i>Oscillibacter</i>                | 2.07  | 1.92     | 0.48  | 1.48 | 0.94   | 1.10     | 0.25   | 0.88  | 0.79     | 1.35  | 0.57   | 1.06   | 0.38  | 0.59     | 0.93  | 0.32   | 0.43   | 0.466  |
| <i>Butyricimonas</i>                | 0.52  | 0.24     | 0.20  | 0.92 | 0.62   | 0.59     | 1.33   | 0.21  | 0        | 0.13  | 0.68   | 0.42   | 0.07  | 0.06     | 0     | 0.22   | 0.05   | 0.469  |
| <i>Coprococcus</i>                  | 1.08  | 0.07     | 0.54  | 0.12 | 1.20   | 0.25     | 0.26   | 1.51  | 0.96     | 2.30  | 0.75   | 3.14   | 4.34  | 0.92     | 0.74  | 0.50   | 0.18   | 0.773  |
| <i>Parabacteroides</i>              | 0.42  | 1.16     | 0.89  | 0.25 | 0.13   | 0.57     | 0.03   | 0.52  | 0.72     | 0.13  | 0.61   | 1.97   | 0.51  | 0.55     | 0.72  | 1.33   | 0.18   | 0.636  |
| <i>Helicobacter</i>                 | 0.88  | 0.23     | 0.10  | 0.56 | 0.70   | 0.03     | 0.27   | 2.03  | 0.19     | 0.11  | 2.26   | 0.43   | 1.01  | 0.10     | 0.02  | 0.87   | 0.02   | 1.446  |
| <i>Agathobacter</i>                 | 0     | 0        | 0.67  | 0    | 0.16   | 0        | 0.07   | 0.71  | 1.94     | 0.67  | 0.07   | 0.07   | 1.89  | 1.85     | 2.00  | 0.07   | 0      | 0.590  |
| <i>Terrisporobacter</i>             | 0.20  | 0.16     | 0.16  | 0.26 | 0.30   | 0.14     | 0.05   | 1.15  | 0.34     | 1.94  | 0.60   | 0      | 0.63  | 0.12     | 0.93  | 0.76   | 0.13   | 0.441  |
| <i>Prevotellaceae_UCG_001</i>       | 0.35  | 0.46     | 0.31  | 0.28 | 0.22   | 0.54     | 2.36   | 0.68  | 0.73     | 0.51  | 0.26   | 0      | 0.49  | 0.39     | 0.60  | 0.72   | 0.32   | 0.805  |
| <i>Tuzzerella</i>                   | 0.38  | 0.69     | 1.50  | 0.01 | 0.32   | 1.27     | 0.23   | 0.29  | 0.86     | 0.32  | 0.17   | 1.15   | 1.09  | 1.05     | 0     | 1.60   | 1.71   | 0.568  |
| <i>Romboutsia</i>                   | 0.47  | 0.11     | 0.60  | 0.10 | 0.38   | 0.05     | 0.14   | 0.37  | 0.18     | 0.16  | 0.44   | 0      | 0     | 0        | 0.12  | 0.30   | 0.11   | 0.288  |
| <i>Blautia</i>                      | 1.00  | 0.12     | 0.18  | 0.20 | 0.59   | 0.12     | 0.13   | 1.53  | 0.42     | 1.82  | 0.63   | 0.23   | 3.92  | 1.42     | 0.64  | 0      | 0.42   | 0.589  |
| <i>Dorea</i>                        | 0.38  | 0.31     | 0.26  | 0.12 | 0.43   | 0.47     | 1.29   | 0.77  | 0.29     | 1.13  | 0.67   | 0.75   | 1.11  | 0.82     | 0.35  | 0      | 0.63   | 0.398  |
| <i>Porphyromonas</i>                | 0     | 0.02     | 0.06  | 0.10 | 0.20   | 0.05     | 0.00   | 0.21  | 0.08     | 0.01  | 0.42   | 0.10   | 0.05  | 0        | 0.08  | 0.05   | 0.10   | 0.420  |
| <i>Alistipes</i>                    | 1.05  | 0        | 1.88  | 1.29 | 0.48   | 0.16     | 1.83   | 0.16  | 0.29     | 0.25  | 0.58   | 0      | 0.15  | 0        | 0     | 0      | 0      | 0.470  |
| <i>Lachnospiraceae_AC2044_group</i> | 0.13  | 0.09     | 0.03  | 0    | 0.06   | 0.11     | 0      | 0.77  | 1.59     | 3.56  | 0.22   | 0.83   | 0.71  | 0.75     | 1.19  | 0.82   | 0.66   | 0.505  |

|                                      | P-value |        |             |             |                   |                     |                           |
|--------------------------------------|---------|--------|-------------|-------------|-------------------|---------------------|---------------------------|
|                                      | DoL     | Color  | DoL × Color | Consistency | DoL × Consistency | Color × Consistency | DoL × Color × Consistency |
| <i>Lactobacillus</i>                 | 0.900   | 0.516  | 0.431       | 0.813       | 0.398             | 0.931               | 0.951                     |
| <i>Escherichia_Shigella</i>          | 0.0002  | 0.887  | 0.846       | 0.069       | 0.752             | 0.875               | 0.998                     |
| <i>Bacteroides</i>                   | 0.036   | 0.826  | 0.274       | 0.267       | 0.473             | 0.477               | 0.915                     |
| <i>Prevotella</i>                    | <0.001  | 0.003  | 0.0002      | 0.072       | <0.001            | 0.403               | 0.116                     |
| <i>Actinobacillus</i>                | 0.003   | 0.998  | 0.971       | 0.774       | 0.887             | 0.989               | 0.997                     |
| <i>Fusobacterium</i>                 | 0.004   | 0.037  | 0.875       | 0.800       | 0.044             | 0.210               | 0.855                     |
| <i>Alloprevotella</i>                | 0.182   | 0.015  | 0.847       | 0.013       | 0.238             | 0.008               | 0.714                     |
| <i>Rikenellaceae_RC9_gut_group</i>   | <0.001  | 0.926  | 0.462       | 0.179       | 0.007             | 0.110               | 0.645                     |
| <i>Clostridium_sensu_stricto_1</i>   | <0.001  | 0.329  | 0.289       | <0.001      | <0.001            | 0.986               | 0.994                     |
| <i>Streptococcus</i>                 | 0.608   | 0.995  | 0.992       | 0.568       | 0.986             | 0.975               | 0.941                     |
| <i>Lachnoclostridium</i>             | 0.177   | 0.164  | 0.976       | 0.440       | 0.938             | 0.827               | 0.242                     |
| <i>Phascolarctobacterium</i>         | <0.001  | 0.273  | 0.211       | 0.110       | 0.080             | 0.740               | 0.136                     |
| <i>Campylobacter</i>                 | <0.001  | 0.070  | <0.001      | 0.015       | <0.001            | <0.001              | <0.001                    |
| <i>Megasphaera</i>                   | 0.509   | 0.799  | 0.985       | 0.742       | 0.541             | 0.974               | 0.933                     |
| <i>Christensenellaceae_R_7_group</i> | <0.001  | 0.032  | 0.006       | 0.198       | 0.697             | 0.080               | 0.019                     |
| <i>Prevotellaceae_NK3B31_group</i>   | 0.021   | <0.001 | 0.039       | 0.0001      | <0.001            | 0.016               | 0.758                     |
| <i>UCG_002</i>                       | 0.017   | 0.413  | 0.761       | 0.725       | 0.101             | 0.126               | 0.018                     |
| <i>Roseburia</i>                     | 0.115   | 0.824  | 0.251       | 0.087       | 0.192             | 0.936               | 0.154                     |
| <i>NK4A214_group</i>                 | <0.001  | 0.612  | 0.469       | 0.818       | 0.351             | 0.039               | 0.028                     |
| <i>Moraxella</i>                     | <0.001  | 0.972  | 0.997       | <0.001      | <0.001            | 0.999               | 1.000                     |
| <i>Veillonella</i>                   | <0.001  | 0.837  | 0.531       | 0.147       | 0.986             | 0.989               | 0.985                     |
| <i>Enterococcus</i>                  | 0.769   | 0.861  | 0.925       | 0.918       | 0.957             | 0.900               | 0.933                     |
| <i>Family_XIII_AD3011_group</i>      | <0.001  | 0.172  | 0.103       | 0.014       | <0.001            | <0.001              | <0.001                    |
| <i>Desulfovibrio</i>                 | <0.001  | 0.626  | 0.475       | 0.774       | 0.078             | 0.275               | 0.510                     |

|                                      | P-value |        |             |             |                   |                     |                           |
|--------------------------------------|---------|--------|-------------|-------------|-------------------|---------------------|---------------------------|
|                                      | DoL     | Color  | DoL × Color | Consistency | DoL × Consistency | Color × Consistency | DoL × Color × Consistency |
| <i>Lachnospiraceae_NK4A136_group</i> | <0.001  | 0.004  | 0.700       | 0.015       | <0.001            | 0.106               | 0.014                     |
| <i>Colidextribacter</i>              | 0.003   | 0.193  | 0.362       | 0.188       | 0.303             | 0.352               | 0.078                     |
| <i>Ruminococcus</i>                  | 0.004   | 0.417  | 0.010       | 0.043       | 0.001             | 0.339               | 0.238                     |
| <i>Rothia</i>                        | 0.032   | 0.937  | 0.671       | 0.923       | 0.920             | 0.980               | 0.995                     |
| <i>Subdoligranulum</i>               | 0.602   | 0.019  | 0.591       | 0.032       | 0.090             | 0.043               | 0.027                     |
| <i>Mitsuokella</i>                   | 0.912   | 0.812  | 0.990       | 0.916       | 1.000             | 1.000               | 1.000                     |
| <i>Oscillibacter</i>                 | 0.002   | 0.004  | 0.027       | 0.083       | 0.0010            | 0.032               | 0.074                     |
| <i>Butyricimonas</i>                 | <0.001  | 0.602  | 0.068       | 0.002       | <0.001            | 0.759               | 0.142                     |
| <i>Coprococcus</i>                   | 0.043   | 0.718  | 0.436       | 0.476       | 0.271             | 0.686               | 0.394                     |
| <i>Parabacteroides</i>               | 0.037   | <0.001 | 0.005       | 0.989       | 0.975             | 0.993               | 0.604                     |
| <i>Helicobacter</i>                  | 0.969   | 0.967  | 0.993       | 0.823       | 0.998             | 0.942               | 0.970                     |
| <i>Agathobacter</i>                  | 0.167   | 0.476  | 0.532       | 0.968       | 0.769             | 0.968               | 0.972                     |
| <i>Terrisporobacter</i>              | 0.212   | 0.247  | 0.357       | 0.934       | 0.104             | 0.536               | 0.381                     |
| <i>Prevotellaceae_UCG_001</i>        | 0.856   | 0.731  | 0.475       | 0.930       | 0.910             | 0.956               | 0.623                     |
| <i>Tuzzerella</i>                    | <0.001  | <0.001 | 0.006       | <0.001      | <0.001            | <0.001              | 0.002                     |
| <i>Romboutsia</i>                    | 0.635   | 0.780  | 0.969       | 0.027       | 0.999             | 0.811               | 0.913                     |
| <i>Blautia</i>                       | 0.195   | 0.225  | 0.106       | 0.281       | 0.915             | 0.599               | 0.211                     |
| <i>Dorea</i>                         | 0.046   | 0.290  | 0.549       | 0.294       | 0.502             | 0.465               | 0.709                     |
| <i>Porphyromonas</i>                 | 0.986   | 0.935  | 0.992       | 0.916       | 0.996             | 0.996               | 0.998                     |
| <i>Alistipes</i>                     | 0.025   | 0.503  | 0.992       | 0.175       | 0.091             | 0.996               | 0.732                     |
| <i>Lachnospiraceae_AC2044_group</i>  | 0.022   | 0.072  | 0.267       | 0.840       | 0.487             | 0.193               | 0.291                     |

\*Values are least squares means ± pooled standard error of the mean (SEM). Piglets were weaned on day 28 of life. Proportional abundances are presented that represent >0.2% of all reads.

**Table S7.** Differences in relative bacterial abundances (% of total reads) in different fecal sample types obtained from suckling and newly weaned piglets during the suckling and early postweaning phase.\*

22  
23

| Day of Life (DoL)                    | 2     |       |       |       | 6     |       |       | 13    |       |       | 20   |      |       | 27    |      |       | 30    |      |      | 34    |      |      | P-value |        |        |        |
|--------------------------------------|-------|-------|-------|-------|-------|-------|-------|-------|-------|-------|------|------|-------|-------|------|-------|-------|------|------|-------|------|------|---------|--------|--------|--------|
|                                      |       |       |       |       |       |       |       |       |       |       | F +  |      |       |       |      |       |       |      |      |       |      |      | Pooled  |        | DoL ×  |        |
| Sample Type                          | F + S | F     | M     | S     | F + S | F     | S     | F + S | F     | S     | S    | F    | S     | F + S | F    | S     | F + S | F    | S    | F + S | F    | S    | SEM     | DoL    | Type   | type   |
| <i>Lactobacillus</i>                 | 0.89  | 1.10  | 0.02  | 2.93  | 6.31  | 3.75  | 4.13  | 11.58 | 14.89 | 2.25  | 2.24 | 4.95 | 4.30  | 2.22  | 3.62 | 3.46  | 0.85  | 2.83 | 1.42 | 1.64  | 8.11 | 2.43 | 2.234   | <0.001 | 0.239  | 0.004  |
| <i>Escherichia_Shigella</i>          | 34.18 | 24.44 | 57.97 | 34.21 | 16.18 | 20.12 | 33.07 | 11.92 | 21.47 | 33.57 | 7.80 | 8.85 | 15.76 | 2.10  | 3.41 | 11.13 | 5.55  | 5.11 | 6.83 | 3.00  | 4.64 | 0    | 4.836   | <0.001 | 0.0001 | 0.107  |
| <i>Bacteroides</i>                   | 15.67 | 6.33  | 9.64  | 10.47 | 28.47 | 20.92 | 13.22 | 16.04 | 12.47 | 11.63 | 9.47 | 6.55 | 6.69  | 4.37  | 7.68 | 7.77  | 0.63  | 4.17 | 5.64 | 0     | 0.71 | 1.54 | 3.263   | <0.001 | 0.601  | 0.100  |
| <i>Prevotella</i>                    | 0.56  | 0     | 0.53  | 1.03  | 3.15  | 4.39  | 0.25  | 7.85  | 2.06  | 0.49  | 2.83 | 4.08 | 2.03  | 16.21 | 5.70 | 1.81  | 8.22  | 6.31 | 6.47 | 7.83  | 7.57 | 6.47 | 1.707   | <0.001 | 0.002  | 0.005  |
| <i>Actinobacillus</i>                | 4.13  | 18.33 | 1.11  | 4.20  | 0.96  | 1.02  | 2.45  | 0.54  | 0.90  | 0.28  | 0.73 | 0.48 | 0.02  | 0.26  | 0.46 | 1.46  | 0.99  | 0.21 | 0.32 | 0.19  | 0.11 | 0    | 1.258   | <0.001 | 0.0006 | 0.145  |
| <i>Fusobacterium</i>                 | 18.48 | 9.07  | 7.26  | 13.90 | 6.21  | 16.20 | 9.44  | 0     | 1.23  | 1.44  | 4.34 | 1.88 | 1.07  | 1.78  | 5.86 | 9.25  | 2.23  | 0.32 | 3.53 | 0     | 0    | 1.58 | 2.887   | <0.001 | 0.291  | 0.343  |
| <i>Alloprevotella</i>                | 0.16  | 0.14  | 0.10  | 0.38  | 1.05  | 0.09  | 1.09  | 1.19  | 0.25  | 0.45  | 1.80 | 1.41 | 0.77  | 5.32  | 2.66 | 2.15  | 9.46  | 3.27 | 3.18 | 4.08  | 3.99 | 2.96 | 1.072   | <0.001 | 0.055  | 0.149  |
| <i>Rikenellaceae_RC9_gut_group</i>   | 0     | 0.89  | 0.0   | 0.58  | 0     | 0     | 0.91  | 4.48  | 1.77  | 0.95  | 2.75 | 8.99 | 3.70  | 9.29  | 9.07 | 3.40  | 3.35  | 3.73 | 2.94 | 7.01  | 4.51 | 2.49 | 1.586   | <0.001 | 0.132  | 0.019  |
| <i>Clostridium_sensu_stricto_1</i>   | 16.19 | 30.37 | 3.63  | 14.66 | 3.28  | 5.44  | 2.32  | 1.02  | 1.91  | 2.13  | 0.72 | 2.14 | 1.06  | 0.33  | 0.89 | 3.81  | 1.35  | 1.20 | 3.06 | 2.29  | 1.28 | 1.28 | 2.541   | <0.001 | 0.0003 | 0.785  |
| <i>Streptococcus</i>                 | 2.18  | 1.07  | 0.69  | 4.05  | 2.94  | 2.73  | 1.64  | 0.31  | 1.64  | 1.74  | 0.21 | 0.31 | 1.14  | 0.30  | 0.25 | 3.87  | 1.07  | 1.42 | 2.20 | 0.21  | 0.15 | 0.11 | 1.028   | 0.098  | 0.056  | 0.188  |
| <i>Lachnoclostridium</i>             | 0.75  | 0.03  | 0.17  | 1.02  | 7.34  | 5.61  | 6.23  | 6.92  | 5.71  | 5.07  | 2.96 | 5.20 | 3.48  | 3.39  | 5.02 | 4.66  | 1.60  | 3.67 | 2.60 | 0.34  | 0.57 | 0.73 | 1.716   | 0.0001 | 0.991  | 0.993  |
| <i>Phascolarctobacterium</i>         | 0     | 0.16  | 0.08  | 0.14  | 0.55  | 0.03  | 0.20  | 1.40  | 1.90  | 0.20  | 3.67 | 2.38 | 1.52  | 3.94  | 3.34 | 1.42  | 4.00  | 5.69 | 1.95 | 3.63  | 3.62 | 2.97 | 0.619   | <0.001 | 0.0004 | 0.007  |
| <i>Campylobacter</i>                 | 0     | 0.59  | 0     | 1.92  | 0.18  | 0.10  | 1.49  | 0.92  | 0.37  | 2.46  | 0.19 | 0.46 | 2.19  | 1.25  | 0.62 | 2.10  | 0.17  | 1.63 | 4.31 | 0.99  | 1.39 | 4.95 | 1.163   | 0.466  | 0.0007 | 0.956  |
| <i>Megasphaera</i>                   | 0.16  | 0     | 0.32  | 0     | 0.39  | 0.12  | 0     | 0.17  | 0.77  | 0.06  | 1.47 | 1.16 | 0.58  | 4.56  | 3.07 | 0.58  | 2.21  | 4.82 | 0.73 | 0.41  | 5.79 | 2.61 | 1.309   | 0.012  | 0.141  | 0.452  |
| <i>Christensenellaceae_R_7_group</i> | 0     | 0.38  | 0     | 0.27  | 0     | 0     | 0.40  | 1.06  | 1.24  | 0.65  | 8.27 | 7.09 | 5.72  | 1.64  | 4.45 | 2.55  | 1.66  | 1.33 | 3.54 | 5.09  | 3.41 | 3.39 | 1.370   | <0.001 | 0.995  | 0.746  |
| <i>Prevotellaceae_NK3B31_group</i>   | 0     | 0.30  | 0     | 0.22  | 0.36  | 0     | 0.45  | 1.26  | 0.09  | 0.22  | 1.75 | 0.57 | 0.70  | 2.39  | 1.57 | 0.50  | 4.16  | 2.09 | 2.08 | 3.85  | 3.18 | 2.18 | 0.622   | <0.001 | 0.057  | 0.324  |
| <i>UCG_002</i>                       | 0.32  | 0     | 0.26  | 0     | 2.05  | 0.80  | 0.05  | 4.07  | 3.77  | 0.48  | 0.89 | 5.72 | 1.86  | 1.51  | 2.50 | 1.60  | 2.80  | 4.12 | 1.59 | 3.00  | 3.47 | 2.58 | 0.837   | 0.001  | 0.0014 | 0.008  |
| <i>Roseburia</i>                     | 0     | 0.15  | 0     | 0.32  | 0.01  | 0     | 0.33  | 0     | 0.88  | 0.19  | 2.06 | 1.01 | 0.99  | 4.05  | 0.82 | 0.65  | 2.42  | 2.98 | 1.44 | 2.17  | 1.82 | 1.73 | 0.605   | <0.001 | 0.309  | 0.050  |
| <i>NK4A214_group</i>                 | 0.13  | 0     | 0.11  | 0     | 0.46  | 0.11  | 0.05  | 1.38  | 2.61  | 0.15  | 2.04 | 2.43 | 1.44  | 0.93  | 1.43 | 0.77  | 2.67  | 1.95 | 1.55 | 2.64  | 2.22 | 2.53 | 0.465   | <0.001 | 0.061  | 0.035  |
| <i>Moraxella</i>                     | 0.50  | 2.87  | 0.08  | 0.03  | 0.05  | 0.06  | 0.04  | 0.01  | 0.02  | 0.05  | 0    | 0    | 0.02  | 0     | 0    | 0.01  | 0.02  | 0    | 0    | 0     | 0    | 0    | 0.042   | <0.001 | <0.001 | <0.001 |
| <i>Veillonella</i>                   | 1.36  | 1.46  | 0.71  | 1.09  | 1.23  | 1.75  | 0.61  | 0.40  | 0.67  | 0.05  | 0.12 | 0.28 | 0.09  | 0.53  | 0.23 | 0.06  | 0.24  | 0.08 | 0.02 | 0.05  | 0.08 | 0    | 0.220   | <0.001 | 0.012  | 0.294  |
| <i>Enterococcus</i>                  | 0.61  | 0     | 1.61  | 0.48  | 1.03  | 1.49  | 3.62  | 0.66  | 1.82  | 5.90  | 0.27 | 0.67 | 2.20  | 0.22  | 0.15 | 2.14  | 0.27  | 0.21 | 0    | 0.45  | 0.23 | 0    | 0.843   | <0.001 | 0.005  | 0.002  |

| Day of Life (DoL)             |  | 2     |      |      |      | 6     |      |      | 13    |      |      | 20   |      |      | 27    |      |      | 30    |      |      | 34    |      |      | P-value |        |        |        |
|-------------------------------|--|-------|------|------|------|-------|------|------|-------|------|------|------|------|------|-------|------|------|-------|------|------|-------|------|------|---------|--------|--------|--------|
|                               |  |       |      |      |      |       |      |      |       |      |      | F +  |      |      |       |      |      |       |      |      |       |      |      | Pooled  |        | DoL ×  |        |
| Sample Type                   |  | F + S | F    | M    | S    | F + S | F    | S    | F + S | F    | S    | S    | F    | S    | F + S | F    | S    | F + S | F    | S    | F + S | F    | S    | SEM     | DoL    | Type   | Type   |
| Family_XIII_AD3011_group      |  | 0.02  | 0.01 | 0.03 | 0.01 | 0.07  | 0.01 | 0.01 | 0.60  | 0.32 | 0.05 | 2.39 | 0.92 | 0.94 | 0.69  | 1.49 | 0.60 | 1.50  | 1.32 | 1.62 | 1.78  | 1.42 | 2.15 | 0.389   | <0.001 | 0.778  | 0.122  |
| Desulfovibrio                 |  | 0     | 0.02 | 0.02 | 0.12 | 0.93  | 0.77 | 0.38 | 1.36  | 0.70 | 0.46 | 0.88 | 0.97 | 0.74 | 1.29  | 1.50 | 0.62 | 1.00  | 0.79 | 0.79 | 0.86  | 0.61 | 0.64 | 0.229   | 0.006  | 0.052  | 0.082  |
| Lachnospiraceae_NK4A136_group |  | 0     | 0.16 | 0    | 0.09 | 0     | 0    | 0.14 | 0     | 0    | 0.10 | 0.76 | 0.28 | 0.34 | 0.36  | 0.80 | 0.32 | 3.96  | 3.43 | 1.88 | 1.56  | 1.68 | 1.55 | 0.534   | <0.001 | 0.800  | 0.412  |
| Colidextribacter              |  | 0.10  | 0.00 | 0.07 | 0.05 | 0.68  | 0.49 | 0.19 | 0.95  | 0.60 | 0.21 | 0.56 | 0.68 | 0.73 | 0.56  | 1.00 | 0.30 | 0.86  | 0.52 | 0.67 | 0.55  | 0.62 | 0.84 | 0.208   | 0.129  | 0.466  | 0.033  |
| Ruminococcus                  |  | 0     | 0.21 | 0    | 0.19 | 0.51  | 0.28 | 0.76 | 0.56  | 0.43 | 0.88 | 0.39 | 0.83 | 1.31 | 0.16  | 1.24 | 1.73 | 1.37  | 0.69 | 1.86 | 1.05  | 0.91 | 1.13 | 0.374   | 0.026  | 0.030  | 0.686  |
| Rothia                        |  | 0.14  | 0.26 | 0.07 | 0.06 | 0.08  | 0.15 | 0.04 | 0.03  | 0.09 | 0.02 | 0.02 | 0.05 | 0.04 | 0.02  | 0.01 | 0.01 | 0     | 0.01 | 0.01 | 0     | 0    | 0.01 | 0.024   | <0.001 | 0.002  | 0.008  |
| Subdoligranulum               |  | 0.15  | 0    | 0.12 | 0    | 0.22  | 0.17 | 0.02 | 0.67  | 0.37 | 0.19 | 2.08 | 0.54 | 0.33 | 0.62  | 1.38 | 0.78 | 1.16  | 0.85 | 1.19 | 1.92  | 1.27 | 1.53 | 0.435   | 0.0005 | 0.498  | 0.598  |
| Mitsuokella                   |  | 0.05  | 0.22 | 0.24 | 0    | 0.06  | 0.11 | 0    | 0.04  | 0.01 | 0.01 | 0.57 | 0.16 | 0.09 | 1.09  | 0.83 | 0.24 | 0.80  | 1.24 | 0.25 | 0.60  | 2.86 | 2.87 | 0.911   | 0.104  | 0.917  | 0.993  |
| Oscillibacter                 |  | 0.03  | 0    | 0.09 | 0    | 0.09  | 0.02 | 0    | 0.42  | 0.17 | 0    | 1.37 | 1.01 | 0.68 | 1.39  | 1.54 | 0.26 | 0.95  | 0.72 | 0.83 | 1.10  | 0.70 | 0.32 | 0.317   | <0.001 | 0.073  | 0.260  |
| Butyrivimonas                 |  | 0.01  | 0    | 0.02 | 0.06 | 0.67  | 1.03 | 0.18 | 2.95  | 1.25 | 0.65 | 0.56 | 0.93 | 0.33 | 0.50  | 0.82 | 0.47 | 0.09  | 0.15 | 0.37 | 0.01  | 0.05 | 0.04 | 0.334   | <0.001 | 0.186  | 0.002  |
| Coprococcus                   |  | 0.02  | 0    | 0.04 | 0.06 | 0.07  | 0.22 | 0.04 | 0.19  | 0.12 | 0.24 | 1.94 | 0.40 | 0.31 | 1.56  | 0.81 | 0.54 | 1.82  | 0.52 | 1.47 | 1.20  | 0.87 | 4.00 | 0.463   | <0.001 | 0.147  | <0.001 |
| Parabacteroides               |  | 0.23  | 0    | 0.43 | 0.31 | 1.32  | 0.76 | 0.44 | 0.72  | 1.16 | 0.48 | 2.98 | 0.58 | 0.10 | 0.17  | 0.54 | 0.09 | 0.71  | 0.48 | 0.64 | 0.66  | 0.65 | 0.49 | 0.408   | 0.074  | 0.105  | 0.029  |
| Helicobacter                  |  | 0     | 0.11 | 0    | 0.07 | 0.08  | 0    | 0.17 | 0.16  | 0.06 | 0.30 | 0.10 | 0.27 | 3.83 | 0.35  | 0.18 | 1.02 | 0.17  | 0.01 | 2.30 | 0     | 0    | 1.09 | 0.826   | 0.358  | 0.028  | 0.194  |
| Agathobacter                  |  | 0     | 0.13 | 0    | 0.08 | 0     | 0    | 0.14 | 0     | 0.04 | 0.08 | 0    | 0    | 0.08 | 0     | 0.09 | 0.22 | 2.02  | 1.10 | 0.50 | 1.92  | 1.71 | 1.88 | 0.362   | <0.001 | 0.986  | 0.502  |
| Terrisporobacter              |  | 0.19  | 0.06 | 0.14 | 0.55 | 0.15  | 0.04 | 0.09 | 0.11  | 0.04 | 0.54 | 0.23 | 0.47 | 0.47 | 0.10  | 0.17 | 0.30 | 0.61  | 0.35 | 1.05 | 0.90  | 0.39 | 0.58 | 0.274   | 0.066  | 0.186  | 0.846  |
| Prevotellaceae_UCG_001        |  | 0.05  | 0    | 0.04 | 0.0  | 0.05  | 0.02 | 0    | 0.18  | 1.00 | 0.01 | 0.16 | 1.11 | 0.01 | 1.38  | 0.87 | 0.06 | 0.57  | 0.63 | 0.50 | 0.54  | 0.40 | 0.56 | 0.499   | 0.551  | 0.458  | 0.784  |
| Tuzzerella                    |  | 0     | 0.07 | 0    | 0.17 | 0.20  | 0.18 | 0.18 | 0.15  | 0.33 | 0.09 | 0.89 | 1.24 | 0.23 | 0.32  | 0.69 | 0.32 | 0.71  | 0.68 | 0.27 | 0.17  | 0.79 | 1.08 | 0.411   | 0.290  | 0.762  | 0.812  |
| Romboutsia                    |  | 0.10  | 0    | 1.01 | 0    | 0.16  | 0.05 | 0.04 | 0.23  | 0.31 | 0.37 | 0.28 | 0.32 | 0.27 | 0.11  | 0.42 | 0.20 | 0.15  | 0.17 | 0.41 | 0.10  | 0.05 | 0    | 0.170   | 0.238  | 0.0003 | 0.898  |
| Blautia                       |  | 0.05  | 0    | 0.04 | 0    | 0.11  | 0.16 | 0.04 | 0.07  | 0.10 | 0    | 0.49 | 0.20 | 0.26 | 0.14  | 0.21 | 0.87 | 0.52  | 0.39 | 1.33 | 2.36  | 0.61 | 4.00 | 0.333   | <0.001 | 0.002  | <0.001 |
| Dorea                         |  | 0.02  | 0    | 0.02 | 0.06 | 0.12  | 0.06 | 0.06 | 0.42  | 0.47 | 0.10 | 0.45 | 0.93 | 0.88 | 0.30  | 0.66 | 0.41 | 0.32  | 0.56 | 0.74 | 0.80  | 0.63 | 1.03 | 0.243   | 0.0007 | 0.854  | 0.599  |
| Porphyromonas                 |  | 0.04  | 0    | 0.01 | 0.07 | 0.14  | 0.01 | 0.57 | 0.05  | 0    | 0.68 | 0.01 | 0.01 | 0.01 | 0.01  | 0.01 | 0.23 | 0.01  | 0.01 | 0.35 | 0.03  | 0.01 | 0.06 | 0.246   | 0.788  | 0.152  | 0.841  |
| Alistipes                     |  | 0     | 0.04 | 0    | 0.03 | 0.58  | 0.25 | 0.15 | 1.76  | 1.18 | 0.31 | 0.30 | 0.69 | 0.13 | 0.62  | 1.29 | 0.18 | 0.24  | 0.42 | 0.28 | 0     | 0.03 | 0.05 | 0.279   | <0.001 | 0.048  | 0.016  |
| Lachnospiraceae_AC2044_group  |  | 0     | 0.01 | 0    | 0.01 | 0     | 0    | 0.01 | 0.05  | 0.01 | 0.08 | 0.31 | 0.38 | 0.76 | 0.08  | 0.03 | 0.10 | 1.86  | 1.60 | 0.64 | 0.90  | 0.92 | 0.70 | 0.313   | <0.001 | 0.910  | 0.262  |

\*Values are least squares means ± pooled standard error of the mean (SEM). Piglets were weaned on day 28 of life. Sample type: F, feces; M, meconium; S, swab; F + S, combined feces + swab sample. Proportional abundances are presented that represent >0.2% of all reads.
